# Supplementary material
Source: Research Square preprint supplement (doi:10.21203/rs.3.rs-9201156/v1)
Supplement: Supplementary file 1 [file 8729982c293d2652cdd152a8.pdf]

## Abdominal Radiology

### *Pretreatment MRI Parameters as Predictive Biomarkers for Hormonal Therapy Response in Adenomyosis: A Comprehensive Analysis*

Kazuhiko Morikawa, Akira Baba, Shun Kusada, Satoshi Matsushima, Yohei Ohki, Megumi Shiraishi, Yoshitake Miyamoto, Aya Igarashi, Yumari Kusano, Ayako Kawabata, Hiroya Ojiri

Department of Radiology, The Jikei University School of Medicine, Tokyo, Japan

Corresponding author: k.morikawa@jikei.ac.jp

---

Supplementary table 1. Demographic, clinical, and radiological characteristics of the study population.

|                                           | <b>GnRH (n=32)</b>   | <b>DNG (n=46)</b>  | <b>P value</b> |
|-------------------------------------------|----------------------|--------------------|----------------|
| Age (years) [range]                       | 46.0 [31–54]         | 43 [22-52]         | 0.0018         |
| Age at menarche (years) [range]           | 12 [9-14] (n=20)     | 13 [9-16] (n=32)   | 0.129          |
| Menstrual cycle length (days) [range]     | 28 [25-49] (n=21)    | 28 [25-30] (n=30)  | 0.819          |
| Duration of menstruation (days) [range]   | 6 [3-10] (n=21)      | 6 [4-10] (n=31)    | 0.812          |
| Infertility                               | 5 (5/32, 15.6%)      | 11 (11/46, 23.9%)  | 0.41           |
| History of gynecologic surgery or disease | 7 (7/32, 21.9%)      | 14 (14/46, 30.4%)  | 0.671          |
| History of hormonal therapy               | 7 (7/32, 21.9%)      | 2 (2/46, 4.3%)     | 0.028          |
| ≥1-month drug-free interval before MRI    | 2 (2/7, 28.6%) (n=7) | 1 (1/2, 50%) (n=2) | 1              |
| Modified Andersch–Milsom scale            |                      |                    |                |

|                                                                         |                        |                          |         |
|-------------------------------------------------------------------------|------------------------|--------------------------|---------|
| Pre-treatment [Pts count of each grade 0/1/2/3]                         | 2 [3/10/15/4]          | 2 [1/8/30/7]             | 0.186   |
| Post-treatment [Pts count of grade 0/1/2/3]                             | 1 [15/17/0/0]          | 1 [11/24/9/2]            | 0.00616 |
| Menorrhagia                                                             |                        |                          |         |
| Pre-treatment                                                           | 27 (27/32, 84.4%)      | 28 (28/46, 60.9%)        | 0.0421  |
| Post-treatment                                                          | 2 (2/32, 6.3%)         | 10 (10/46, 21.7%)        | 0.108   |
| Serum hemoglobin (g/dL)                                                 |                        |                          |         |
| Pre-treatment [range]                                                   | 11.2 [5.2-14.0] (n=31) | 11.9 [6.4-14.1] (n=36)   | 0.0682  |
| Post-treatment [range]                                                  | 13.0 [8.6-14.5] (n=30) | 12.7 [6.8-14.5] (n=36)   | 0.197   |
| Serum CA125 (U/mL)                                                      |                        |                          |         |
| Pre-treatment [range]                                                   | 100.5 [16-444] (n=18)  | 62.5 [11-1083] (n=31)    | 0.198   |
| Post-treatment [range]                                                  | 57.5 [14-126] (n=10)   | 51 [13-149] (n=15)       | 0.657   |
| Adverse effects except irregular bleeding                               | 9 (9/32, 28.1%)        | 3 (3/46, 6.5%)           | 0.022   |
| Irregular bleeding during treatment [Pts count of mild/severe bleeding] | 9 (9/32, 28.1%) [7/2]  | 36 (36/46, 78.3%) [31/5] | <0.001  |
| Unpredictable bleeding during treatment                                 | 1(1/32, 3.1%)          | 3 (3/46, 6.5%)           | 0.64    |
| Treatment period (days) [range]                                         | 140.5 [56-407]         | 189 [22-686]             | 0.0561  |
| Initial hormonal therapy result                                         |                        |                          | <0.001  |
| success                                                                 | 31(31/32, 96.9%)       | 28 (28/46, 60.9%)        |         |
| failure                                                                 | 1(1/32, 3.1%)          | 18 (18/46, 39.1%)        |         |
| Location 1 subtype                                                      |                        |                          | 0.0874  |

|                                                                                 |                   |                   |        |
|---------------------------------------------------------------------------------|-------------------|-------------------|--------|
| Intrinsic                                                                       | 3 (3/32, 9.4%)    | 7 (7/46, 15.2%)   |        |
| Extrinsic                                                                       | 9 (9/32, 28.1%)   | 22 (22/46, 47.8%) |        |
| Intramural                                                                      | 0                 | 1 (1/46, 2.2%)    |        |
| Penetrating                                                                     | 20 (20/32, 62.5%) | 16 (16/46, 34.8%) |        |
| Location 2 distribution pattern                                                 |                   |                   | 0.646  |
| Diffuse                                                                         | 20 (20/32, 62.5%) | 26 (26/46, 56.5%) |        |
| Focal                                                                           | 12 (12/32, 37.5%) | 20 (20/46, 43.5%) |        |
| Location 3 main distribution                                                    |                   |                   | 0.594  |
| Anterior                                                                        | 6 (6/32, 18.8%)   | 7 (7/46, 15.2%)   |        |
| Posterior                                                                       | 19 (19/32, 59.4%) | 30 (30/46, 65.2%) |        |
| Lateral                                                                         | 1 (1/32, 3.1%)    | 1 (1/46, 2.2%)    |        |
| Fundus                                                                          | 2 (2/32, 6.3%)    | 6 (6/46, 13.0%)   |        |
| unclassifiable                                                                  | 4 (4/32, 12.5%)   | 2 (2/46, 4.3%)    |        |
| Ovarian endometriosis                                                           | 18 (18/32, 56.3%) | 34 (34/46, 73.9%) | 0.143  |
| Deep endometriosis                                                              | 21 (21/32, 65.6%) | 28 (28/46, 60.9%) | 0.812  |
| Uterine myoma                                                                   | 26 (26/32, 81.3%) | 21 (21/46, 45.7%) | 0.0021 |
| Subendometrial myoma >2cm                                                       | 8 (8/32, 25.0%)   | 2 (2/46, 4.3%)    | 0.15   |
| Intramural myoma $\geq$ 4 cm                                                    | 10 (10/32, 31.3%) | 2 (2/46, 4.3%)    | 0.0465 |
| Shrinking in endometriotic cyst after treatment<br>[enlarged/unchanged/reduced] | [0/3/14] (n=17)   | [4/8/21] (n=21)   | 0.302  |

|                                                                             |                 |                 |        |
|-----------------------------------------------------------------------------|-----------------|-----------------|--------|
| Shrinking in leiomyoma size after treatment<br>[enlarged/unchanged/reduced] | [0/5/14] (n=18) | [2/17/4] (n=14) | <0.001 |
|-----------------------------------------------------------------------------|-----------------|-----------------|--------|

---

Data are presented as number (percentage) or median [range], as appropriate. Continuous variables were compared using the Mann–Whitney U test, and categorical variables were analyzed using the chi-squared test or Fisher's exact test. Treatment failure includes discontinuation or modification due to adverse effects. DNG, dienogest; GnRH, gonadotropin-releasing hormone.
