# Supplementary material
Source: Research Square preprint supplement (doi:10.21203/rs.3.rs-9201156/v1)
Supplement: Supplementary file 2 [file 89029f638f91d2bd266e2f64.pdf]

## Abdominal Radiology

### *Pretreatment MRI Parameters as Predictive Biomarkers for Hormonal Therapy Response in Adenomyosis: A Comprehensive Analysis*

Kazuhiko Morikawa, Akira Baba, Shun Kusada, Satoshi Matsushima, Yohei Ohki, Megumi Shiraishi, Yoshitake Miyamoto, Aya Igarashi, Yumari Kusano, Ayako Kawabata, Hiroya Ojiri

Department of Radiology, The Jikei University School of Medicine, Tokyo, Japan

Corresponding author: k.morikawa@jikei.ac.jp

---

Supplementary table 3. Comparison of pretreatment signal intensity values and signal intensity ratios between GnRH-treated and DNG-treated groups.

| Parameters               |              | GnRH (n=32)      | DNG (n=46)       | P value | ICC value |
|--------------------------|--------------|------------------|------------------|---------|-----------|
| T2WI intensity value     | Reader 1     | 138 [63-1892]    | 151.5 [38-476]   | 0.251   | 0.98      |
|                          | Reader 2     | 134 [57-1678]    | 152 [56-597]     | 0.161   |           |
|                          | Readers mean | 134.8 [60-1785]  | 165.6 [50-332]   | 0.178   |           |
| T2WI SIR <sub>endo</sub> | Reader 1     | 0.42 [0.16-0.83] | 0.40 [0.12-1.45] | 0.793   | 0.694     |
|                          | Reader 2     | 0.43 [0.23-0.74] | 0.43 [0.20-2.09] | 0.633   |           |
| T2WI SIR <sub>myo</sub>  | Reader 1     | 0.67 [0.25-1.20] | 0.63 [0.22-2.08] | 0.196   | 0.63      |
|                          | Reader 2     | 0.69 [0.26-1.18] | 0.68 [0.36-1.77] | 0.404   |           |
| T2WI SIR <sub>glu</sub>  | Reader 1     | 1.10 [0.55-2.23] | 1.15 [0.29-2.82] | 0.884   | 0.56      |

|                         |              |                  |                  |        |       |
|-------------------------|--------------|------------------|------------------|--------|-------|
|                         | Reader 2     | 1.09 [0.54-2.20] | 1.10 [0.28-2.66] | 0.69   |       |
| DWI intensity value     | Reader 1     | 28.5 [10-453]    | 28.5 [11-230]    | 0.374  | 0.98  |
|                         | Reader 2     | 28.5 [9-479]     | 30.5 [11-225]    | 0.644  |       |
|                         | Readers mean | 27.5 [9.5-466]   | 28.8 [11-228]    | 0.559  |       |
| DWI SIR <sub>endo</sub> | Reader 1     | 0.50 [0.26-1.52] | 0.52 [0.18-0.78] | 0.522  | 0.88  |
|                         | Reader 2     | 0.55 [0.20-1.72] | 0.56 [0.25-0.73] | 0.865  |       |
|                         | Readers mean | 0.52 [0.24-1.62] | 0.55 [0.22-0.76] | 0.691  |       |
| DWI SIR <sub>myo</sub>  | Reader 1     | 1.04 [0.44-2.22] | 1.02 [0.42-1.69] | 0.673  | 0.704 |
|                         | Reader 2     | 1.13 [0.45-2.16] | 1.04 [0.55-1.61] | 0.366  |       |
| DWI SIR <sub>glu</sub>  | Reader 1     | 1.81 [1.00-3.61] | 1.62 [0.94-2.81] | 0.0282 | 0.739 |
|                         | Reader 2     | 1.98 [1.05-3.72] | 1.70 [0.89-3.11] | 0.0402 |       |
| ADC value               | Reader 1     | 0.94 [0.55-1.30] | 0.96 [0.59-1.56] | 0.233  | 0.90  |
|                         | Reader 2     | 0.94 [0.64-1.37] | 0.97 [0.65-1.62] | 0.402  |       |
|                         | Readers mean | 0.95 [0.60-1.33] | 0.97 [0.62-1.59] | 0.253  |       |
| ADC SIR <sub>endo</sub> | Reader 1     | 0.73 [0.38-1.03] | 0.86 [0.37-1.61] | 0.058  | 0.84  |
|                         | Reader 2     | 0.84 [0.43-1.07] | 0.84 [0.40-1.83] | 0.213  |       |
|                         | Readers mean | 0.75 [0.40-1.05] | 0.87 [0.38-1.72] | 0.0973 |       |
| ADC SIR <sub>myo</sub>  | Reader 1     | 0.65 [0.49-1.01] | 0.74 [0.47-1.27] | 0.013  | 0.79  |
|                         | Reader 2     | 0.71 [0.44-1.11] | 0.75 [0.54-1.52] | 0.041  |       |
|                         | Readers mean | 0.67 [0.52-1.06] | 0.74 [0.52-1.36] | 0.0412 |       |

|                        |          |                  |                  |       |      |
|------------------------|----------|------------------|------------------|-------|------|
| ADC SIR <sub>glu</sub> | Reader 1 | 0.85 [0.55-2.18] | 0.84 [0.50-3.32] | 0.682 | 0.51 |
|                        | Reader 2 | 0.82 [0.63-2.50] | 0.87 [0.55-1.63] | 0.868 |      |

Quantitative parameters were analyzed using the Mann–Whitney U test. Interobserver agreement was evaluated using the intraclass correlation coefficient. ADC, apparent diffusion coefficient; DNG, dienogest; DWI, diffusion-weighted imaging; endo, endometrium; glu, gluteal muscle; GnRH, gonadotropin-releasing hormone; myo, myometrium; SIR, signal intensity ratio.
