# Supplementary material
Source: Research Square preprint supplement (doi:10.21203/rs.3.rs-9201156/v1)
Supplement: Supplementary file 3 [file e3d8f38a0cf94cc88ca0e976.pdf]

## Abdominal Radiology

### *Pretreatment MRI Parameters as Predictive Biomarkers for Hormonal Therapy Response in Adenomyosis: A Comprehensive Analysis*

Kazuhiko Morikawa, Akira Baba, Shun Kusada, Satoshi Matsushima, Yohei Ohki, Megumi Shiraishi, Yoshitake Miyamoto, Aya Igarashi, Yumari Kusano, Ayako Kawabata, Hiroya Ojiri

Department of Radiology, The Jikei University School of Medicine, Tokyo, Japan

Corresponding author: k.morikawa@jikei.ac.jp

---

Supplementary table 2. Comparison of quantitative uterine morphologic parameters between GnRH-treated and DNG-treated groups.

| Parameters                              |              | GnRH (n=32)   | DNG (n=46)      | P value | ICC value |
|-----------------------------------------|--------------|---------------|-----------------|---------|-----------|
| maximum wall thickness on sagittal (mm) | Reader 1     | 44 [27-106]   | 34 [14-95]      |         | 0.94      |
|                                         | Reader 2     | 43 [22-102]   | 34 [16-92]      |         |           |
|                                         | Readers mean | 44[26.5-104]  | 34.3 [15-93.5]  | 0.00163 |           |
| maximum diameter of uterine body (mm)   | Reader 1     | 92.5 [57-159] | 66 [41-120]     |         | 0.95      |
|                                         | Reader 2     | 89 [51-150]   | 67 [35-117]     |         |           |
|                                         | Readers mean | 91 [54-153.5] | 66 [41.5-118.5] | <0.001  |           |
| maximum AP diameter (mm)                | Reader 1     | 77.5 [47-143] | 59 [32-120]     |         | 0.93      |

---

|                                        |              |                     |                  |        |      |
|----------------------------------------|--------------|---------------------|------------------|--------|------|
|                                        | Reader 2     | 79.5 [43-145]       | 55.5 [38-105]    |        |      |
|                                        | Readers mean | 79.5 [45-139]       | 57 [40-112.5]    | <0.001 |      |
| uterine body volume (cm <sup>3</sup> ) | Reader 1     | 267 [78-1066]       | 126 [38-554]     |        | 0.96 |
|                                        | Reader 2     | 257.5 [69-1011]     | 124.5 [32-494]   |        |      |
|                                        | Readers mean | 259.8 [73.5-1038.5] | 127.3 [37-489.5] | <0.001 |      |

---

Quantitative MRI parameters are expressed as median [range]. Interobserver agreement was assessed using the intraclass correlation coefficient. AP, anteroposterior; DNG, dienogest; GnRH, gonadotropin-releasing hormone; ICC, intraclass correlation coefficient.
